# Supplementary material for: Circadian clock genes Bmal1 and Period may regulate nocturnal spawning by controlling sex hormone secretion in razor clam Sinonovacula constricta
Source: Frontiers journal article supplement (doi:10.3389/fmars.2022.1074816), 2022-12-09
Supplement: Table_1.docx [file Table_1.docx]

Supplementary Material

# Supplementary Tables

**TABLE S1 Species and GenBank accession numbers of Bmal1 and Period protein sequences used for multiple alignment and phylogenetic analysis**

| Species/Bmal1 | GenBank No. | Size | Species/Period | GenBank No. | Size |
| --- | --- | --- | --- | --- | --- |
| *Bubalus bubalis* | XP_025122455.1 | 602 | *Bubalus bubalis* | XP_006066832.2 | 1297 |
| *Capra hircus* | XP_005689659.1 | 626 | *Oryctolagus cuniculus* | XP_017195092.1 | 1189 |
| *Mus musculus* | XP_006507308.1 | 638 | *Danio rerio* | XP_021334312.1 | 1415 |
| *Homo sapiens* | XP_016873227.1 | 674 | *Xenopus laevis* | NP_001079172.2 | 1234 |
| *Gallus gallus* | XP_040556474.1 | 626 | *Oreochromis niloticus* | XP_005469398.2 | 1296 |
| *Xenopus laevis* | AAW80970.1 | 627 | *Gallus gallus* | XP_040507059.1 | 929 |
| *Oreochromis niloticus* | XP_005449385.1 | 638 | *Mus musculus* | XP_017175525.1 | 803 |
| *Danio rerio* | AAF64396.1 | 575 | *Homo sapiens* | NP_001276792.1 | 1184 |
| *Melibe leonina* | AWY10924.1 | 698 | *Penaeus japonicus* | XP_042864688.1 | 1248 |
| *Sinonovacula constricta* | OP779227 | 647 | *Sinonovacula constricta* | OP779227 | 1036 |
| *Crassostrea gigas* | AQM57603.1 | 661 | *Pecten maximus* | XP_033763799.1 | 1292 |
| *Mytilus galloprovincialis* | VDH91226.1 | 601 | *Mizuhopecten yessoensis* | XP_021375509.1 | 1264 |
| *Bathymodiolus azoricus* | QKO00501.1 | 627 | *Crassostrea gigas* | AQM57604.1 | 1314 |
| *Penaeus vannamei* | ROT67541.1 | 635 | *Mytilus coruscus* | CAC5372352.1 | 1087 |
| *Scylla paramamosain* | ARO76396.1 | 656 | *Bathymodiolus azoricus* | QKO00506.1 | 1257 |
